# Supplementary material
Source: PubMed Central journal article supplement (PMC5813286)

**Figure S1**

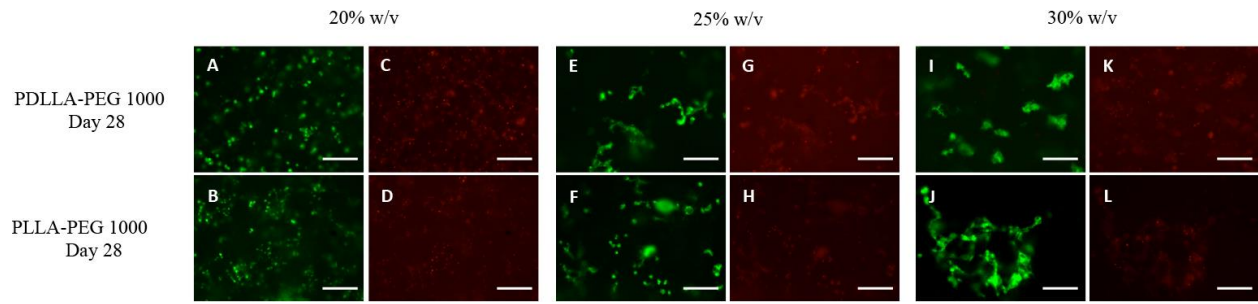

Supplement: NIHMS936095-supplement-supplement_1.pdf [file NIHMS936095-supplement-supplement_1.pdf]
